# Supplementary material
Source: PubMed Central journal article supplement (PMC2700763)
Supplement: NIHMS86210-supplement-Supp_Tab_9.pdf [file NIHMS86210-supplement-Supp_Tab_9.pdf]

**Supplemental Table 9.** Analysis of published NHR structures with experimentally observed structural disorder. Where predicted disorder for each residue with PONDR VL3H has a probability > 50%.

| <b>Family</b> | <b>Name</b>                    | <b>Experimentally observed disordered region</b>                                                                                                                                                                                                                                                                                                                                     | <b>Agreement in observed and predicted disorder domain from this study</b> | <b>Reference</b> |
|---------------|--------------------------------|--------------------------------------------------------------------------------------------------------------------------------------------------------------------------------------------------------------------------------------------------------------------------------------------------------------------------------------------------------------------------------------|----------------------------------------------------------------------------|------------------|
| 1A1           | <b>TR <math>\alpha</math></b>  | D domain (hinge, R152 – T161) is disordered in TR $\alpha$ (only a fraction of the areas could be seen in the electron density). In contrast this area in TR $\beta$ is an $\alpha$ -helix. Authors suggest it could either fold into segments of an extended DBD and LBD or unfold to form true unstructured hinge that would facilitate rotational flexibility between LBD and DBD | Yes                                                                        | 1                |
| 1A2           | TR $\beta$                     | No disorder mentioned                                                                                                                                                                                                                                                                                                                                                                |                                                                            | 2                |
|               |                                | Mouse- Helix H2 and the connection between H2 and H3 could not be modeled due to poor electron density                                                                                                                                                                                                                                                                               |                                                                            | 3                |
| 1B1           | <b>RAR <math>\alpha</math></b> |                                                                                                                                                                                                                                                                                                                                                                                      |                                                                            |                  |

|     |                                 |                                                                                                                                                                      |     |    |
|-----|---------------------------------|----------------------------------------------------------------------------------------------------------------------------------------------------------------------|-----|----|
|     |                                 | in this region.                                                                                                                                                      |     |    |
|     |                                 | Mouse- D-region and the last 30 residues of the F-region in RAR $\beta$ , could not be modeled due to poor electron density in these regions.                        | Yes | 4  |
| 1B2 | <b>RAR <math>\beta</math></b>   | RAR $\beta$ C-terminal F region.                                                                                                                                     |     |    |
| 1B3 | RAR $\gamma$                    | No mention of disorder                                                                                                                                               |     | 5  |
| 1C1 | <b>PPAR <math>\alpha</math></b> | No mention of disorder                                                                                                                                               |     | 6  |
|     |                                 | NMR studies on PPAR- $\alpha$ indicate that the LBD is a flexible protein fold that does not have a well defined structure until a ligand occupies the binding site. | No  | 7  |
| 1C2 | PPAR $\beta/\delta$             | No mention of disorder                                                                                                                                               |     | 8  |
|     |                                 | Could not get reliable structure for the loop between H2 and H3 of                                                                                                   | Yes | 9  |
| 1C3 | <b>PPAR <math>\gamma</math></b> | PPAR $\gamma$                                                                                                                                                        |     |    |
| 1D1 | Rev-Erb $\alpha$                | No crystal structures found                                                                                                                                          |     |    |
| 1D2 | Rev-Erb $\beta$                 | No crystal structures found                                                                                                                                          |     |    |
| 1F1 | <b>ROR <math>\alpha</math></b>  | Most ROR $\alpha$ amino acids had well-                                                                                                                              | Yes | 10 |

|     |                               |                                                                                                                                            |                                                            |    |
|-----|-------------------------------|--------------------------------------------------------------------------------------------------------------------------------------------|------------------------------------------------------------|----|
|     |                               | defined electron density, except for amino acids 461– 464 in loop L9-10, which had the highest B factors.                                  |                                                            |    |
|     |                               | Rat- a residue (D403) located in loop 9-10 is partially disordered according                                                               | Not tested                                                 | 11 |
| 1F2 | <b>ROR <math>\beta</math></b> | to the electron density map                                                                                                                |                                                            |    |
|     |                               | No mention of disorder                                                                                                                     |                                                            | 12 |
| 1F3 | ROR $\gamma$                  | No crystal structures found                                                                                                                |                                                            |    |
|     |                               | Tobacco budworm: Disorder in 321-                                                                                                          | Yes (4 of 6 residues)                                      | 13 |
| 1H1 | <b>EcR</b>                    | 323, 389, 482, 517-518                                                                                                                     |                                                            |    |
|     |                               | Sweet potato whitefly: no mention of disorder                                                                                              |                                                            | 14 |
|     |                               | Drosophila -A-box (residues 78-91) of EcR DBD disordered in EcR-USP complex but not EcR-RXR complex                                        | Yes (13 of 14 residues)                                    | 15 |
|     |                               | Red flour beetle EcR: no mention of disorder                                                                                               |                                                            | 16 |
|     |                               | Crystal structure of amino acids 207-447 - - Helix 2 (230-247) and loop after strand 2 in beta sheet (315-317) not resolved due to lack of | Yes (helix 2 residues 230-247) and No for residues 315-317 | 17 |
| 1H3 | <b>LXR<math>\alpha</math></b> | interpretable electron density                                                                                                             |                                                            |    |
| 1H2 | <b>LXR<math>\beta</math></b>  | Amino acids 214-461 crystallized                                                                                                           |                                                            | 18 |

could not get apo structures, structure may change in absence of ligand – no mention of disorder

Hairpin loop area displays disorder and differences even between receptor molecules bound to the same ligand. The weak electron density of H12 is comparable with the density of the ligand, suggesting that H12 is flexible in solution when there is no ligand bound.

19

Amino acid residues 205-218 at the N terminal end of the LBD and a stretch of 11 residues between helix 1 and helix 3 (residues 238–248) are disordered.

Yes (residues 205-218) and 4 of 11 residues in between helix 1 and 3

20

15 residue insertion (270-285) between helices 1 and 3 is disordered

Yes (9 of 15 residues)

21

1H4      **FXR**

Rat– no mention of disorder

22

Amino acid residues 165-215, part of the long flexible loop between helices

Yes

23

1I1      **VDR**

1 and 3, were deleted because their

|     |            |                                                                                                                                                                                                                                                                                                                  |                                                               |    |
|-----|------------|------------------------------------------------------------------------------------------------------------------------------------------------------------------------------------------------------------------------------------------------------------------------------------------------------------------|---------------------------------------------------------------|----|
|     |            | present prevented stable crystal formation. This loop does not contribute to ligand interaction.                                                                                                                                                                                                                 |                                                               |    |
|     |            | Large disordered insertion domain at the N-terminal part of the LBD                                                                                                                                                                                                                                              | Yes                                                           | 24 |
|     |            | All PXR structures previously showed residues 178-197 were disordered and 198-210 form a pseudo helix in this structure formed an $\alpha$ -helix through residue 205 – this is unique to PXR.                                                                                                                   | Yes 17 of 20 residues (178-197) yes all residues from 198-210 | 25 |
| 112 | <b>PXR</b> | CD data shows stability with ligand and SRC-1 binding.                                                                                                                                                                                                                                                           |                                                               |    |
|     |            | Rifampicin induces structural disorder at 178-209, 229-235, 310-317, all regions at the base of the LBD. The 2 additional areas were observed in other structures but had high thermal displacement indicative of structural mobility. 192-198-202 pseudo helix changes position and accommodates ligand binding | Residues 229-235 and 310-317 are predicted as ordered         | 26 |
|     |            | No discussion of disorder                                                                                                                                                                                                                                                                                        |                                                               | 27 |

|     |                                |                                        |                     |    |
|-----|--------------------------------|----------------------------------------|---------------------|----|
|     |                                | No discussion of disorder              |                     | 28 |
| 1I3 | CAR                            | Mouse– No discussion of disorder       |                     | 29 |
|     |                                | No discussion of disorder              |                     | 30 |
|     |                                | Electron density is                    | Yes (residues 133-  | 31 |
|     |                                | apparent for all residues except those | 140) and for 5      |    |
|     |                                | at the amino (133–140)                 | residues in 368-382 |    |
|     |                                | and carboxyl (368–382) termini of      | and 8 out of 9 for  |    |
|     |                                | the domain and within the              | residues 157-165    |    |
|     |                                | loop between helices 1 and 3 (the 1/3  |                     |    |
| 2A1 | <b>HNF4A</b>                   | loop, residues 157–165).               |                     |    |
| 2A2 | HNF4A $\gamma$                 | No crystal structures found            |                     |    |
|     |                                | Tobacco budworm USP: Disorder in       | Yes (residues 206-  | 13 |
|     |                                | 206-207, 304, 315-318                  | 207), No (304), yes |    |
| 2B  | <b>USP/RXR</b>                 |                                        | (315-318)           |    |
|     |                                | Drosophila USP -No mention of          |                     | 15 |
|     |                                | disorder                               |                     |    |
|     |                                | Red flour beetle USP: no mention of    |                     | 16 |
|     |                                | disorder                               |                     |    |
|     |                                | Has an additional helix 2 in the same  |                     |    |
|     |                                | position that FXR has disorder which   |                     | 32 |
|     |                                | becomes disordered on ligand           |                     |    |
| 2B1 | <b>RXR <math>\alpha</math></b> | binding                                |                     |    |
|     |                                | No mention of disorder                 |                     | 33 |

|     |                               |                                                                                                                                                                                                                                                                                                             |                            |    |
|-----|-------------------------------|-------------------------------------------------------------------------------------------------------------------------------------------------------------------------------------------------------------------------------------------------------------------------------------------------------------|----------------------------|----|
|     |                               | Residues Arg182 to Cys187 form a distorted helix in the X-ray structure that is not seen in the mean NMR structure. The disorder observed in the D-box of RXR, residues 172 to 176, may well arise from an inherent lack of NOEs because the protein is flexible and undergoes conformational fluctuations. | Yes                        | 34 |
| 2B2 | RXR $\beta$                   | No crystal structures found                                                                                                                                                                                                                                                                                 |                            |    |
| 2B3 | RXR $\gamma$                  | No mention of disorder                                                                                                                                                                                                                                                                                      |                            | 35 |
| 2C1 | TR2                           | No crystal structures found                                                                                                                                                                                                                                                                                 |                            |    |
| 2C2 | TR4                           | No crystal structures found                                                                                                                                                                                                                                                                                 |                            |    |
| 2E1 | TLX                           | No crystal structures found                                                                                                                                                                                                                                                                                 |                            |    |
| 2E3 | PNR                           | No crystal structures found                                                                                                                                                                                                                                                                                 |                            |    |
| 2F1 | COUP TFI                      | No crystal structures found                                                                                                                                                                                                                                                                                 |                            |    |
| 2F2 | COUP TFII                     | No crystal structures found                                                                                                                                                                                                                                                                                 |                            |    |
| 2F6 | EAR 2                         | No crystal structures found                                                                                                                                                                                                                                                                                 |                            |    |
| 3A1 | <b>ER <math>\alpha</math></b> | Residues 301-304 and 549-553 are disordered                                                                                                                                                                                                                                                                 | Yes (301-304) No (549-553) | 36 |
|     |                               | Residues K416-M421 and Y526-L536 are disordered                                                                                                                                                                                                                                                             | No                         | 37 |
|     |                               | 15 residues in DBD disorder                                                                                                                                                                                                                                                                                 |                            | 38 |

|     |                                |                                           |                       |    |
|-----|--------------------------------|-------------------------------------------|-----------------------|----|
|     |                                | ER $\alpha$ -NTD unstructured in solution | Yes                   | 39 |
|     |                                | H12 (486-) and Met336 are                 | Yes (486) No (336)    | 40 |
| 3A2 | <b>ER <math>\beta</math></b>   | disordered                                |                       |    |
|     |                                | H12 disordered in presence of ICI         | No                    | 41 |
|     |                                | ligand. Met 479 disordered.               |                       |    |
|     |                                | ER beta-N terminal unstructured in        | Yes                   | 39 |
|     |                                | solution                                  |                       |    |
|     |                                | Residues P309-P319 and R462-E470          | Yes (309-319)         | 42 |
|     |                                | disordered                                | Residues 462-470 not  |    |
| 3B1 | <b>ERR <math>\alpha</math></b> |                                           | determined            |    |
|     |                                | NMR structure of DBD residues             | Yes                   | 43 |
| 3B2 | <b>ERR <math>\beta</math></b>  | R182, Y185, and 187-194 disordered        |                       |    |
| 3B3 | ERR $\gamma$                   | No mention of disorder                    |                       | 44 |
|     |                                | No mention of disorder.                   |                       | 45 |
| 3C1 | <b>GR</b>                      | No mention of disorder.                   |                       | 46 |
|     |                                | No mention of disorder.                   |                       | 47 |
|     |                                | NTD AF-1 region shown to be               | Yes                   | 48 |
|     |                                | unstructured in solution using NMR        |                       |    |
|     |                                | and circular dichroism                    |                       |    |
| 3C2 | MR                             | No mention of disorder.                   |                       | 49 |
|     |                                | DBD: residues L562, 640-648               | Yes 7 of 9 residues   | 50 |
|     |                                | disordered.                               | (640-648) No (residue |    |
| 3C3 | <b>PR</b>                      |                                           | 562)                  |    |



|     |                |                                                                       |                            |        |
|-----|----------------|-----------------------------------------------------------------------|----------------------------|--------|
|     |                | No mention of disorder.                                               |                            | 51     |
|     |                | NTD sensitive to rapid degradation in limited proteolysis experiments | Yes                        | 52     |
|     |                | indicated disorder                                                    |                            |        |
|     |                | H9-H10 interloop (844-849)                                            | Yes                        | 53     |
| 3C4 | <b>AR</b>      | disordered                                                            |                            |        |
|     |                | Rat LBD: N-terminal 664-671                                           | No                         | 54     |
|     |                | disordered                                                            |                            |        |
|     |                | DBD residues 533-536, 612-637                                         | Yes (612-637) No (533-536) | 55     |
|     |                | disordered                                                            |                            |        |
|     |                | Human N-terminal domain residues 142-485 (AF1) disordered             | Yes                        | 56, 57 |
| 4A1 | Nur77          | No mention of disorder                                                |                            | 58     |
| 4A2 | Nurr1          | No mention of disorder                                                |                            | 59     |
| 4A3 | NOR-1          | No crystal structures found                                           |                            |        |
| 5A1 | SF1            | No mention of disorder                                                |                            | 60     |
|     |                | No mention of disorder (crystal structures of both SF-1 and LRH-1)    |                            | 61     |
|     |                | No mention of disorder (crystal structures of both SF-1 and LRH-1)    |                            | 62     |
|     |                | No mention of disorder (crystal structures of both SF-1 and LRH-1)    |                            | 61     |
| 5A2 | FTZ-F1 $\beta$ | No mention of disorder.                                               |                            | 63     |

|     |      |                                                                    |    |
|-----|------|--------------------------------------------------------------------|----|
|     |      | No mention of disorder (crystal structures of both SF-1 and LRH-1) | 62 |
|     |      | DBD of LRH-1: no mention of disorder                               | 64 |
|     |      | LBD: no mention of disorder                                        | 65 |
| 6A1 | GCNF | No crystal structures found                                        |    |
| 0B1 | DAX1 | No crystal structures found                                        |    |
| 0B2 | SHP  | No crystal structures found                                        |    |

---

DBD = DNA-binding domain, NTD = N-terminal domain, and LBD = ligand binding domain, NHR in bold show disorder or no density in X-ray/NMR.

## References

1. Nascimento, A. S.; Dias, S. M.; Nunes, F. M.; Aparicio, R.; Ambrosio, A. L.; Bleicher, L.; Figueira, A. C.; Santos, M. A.; de Oliveira Neto, M.; Fischer, H.; Togashi, M.; Craievich, A. F.; Garratt, R. C.; Baxter, J. D.; Webb, P.; Polikarpov, I., Structural rearrangements in the thyroid hormone receptor hinge domain and their putative role in the receptor function. *J Mol Biol* **2006**, 360, (3), 586-98.
2. Ribeiro, R. C.; Apriletti, J. W.; Wagner, R. L.; Feng, W.; Kushner, P. J.; Nilsson, S.; Scanlan, T. S.; West, B. L.; Fletterick, R. J.; Baxter, J. D., X-ray crystallographic and functional studies of thyroid hormone receptor. *J Steroid Biochem Mol Biol* **1998**, 65, (1-6), 133-41.

3. Bourguet, W.; Vivat, V.; Wurtz, J. M.; Chambon, P.; Gronemeyer, H.; Moras, D., Crystal structure of a heterodimeric complex of RAR and RXR ligand-binding domains. *Mol Cell* **2000**, 5, (2), 289-98.
4. Pogenberg, V.; Guichou, J. F.; Vivat-Hannah, V.; Kammerer, S.; Perez, E.; Germain, P.; de Lera, A. R.; Gronemeyer, H.; Royer, C. A.; Bourguet, W., Characterization of the interaction between retinoic acid receptor/retinoid X receptor (RAR/RXR) heterodimers and transcriptional coactivators through structural and fluorescence anisotropy studies. *J Biol Chem* **2005**, 280, (2), 1625-33.
5. Klaholz, B. P.; Renaud, J. P.; Mitschler, A.; Zusi, C.; Chambon, P.; Gronemeyer, H.; Moras, D., Conformational adaptation of agonists to the human nuclear receptor RAR gamma. *Nat Struct Biol* **1998**, 5, (3), 199-202.
6. Xu, H. E.; Stanley, T. B.; Montana, V. G.; Lambert, M. H.; Shearer, B. G.; Cobb, J. E.; McKee, D. D.; Galardi, C. M.; Plunket, K. D.; Nolte, R. T.; Parks, D. J.; Moore, J. T.; Kliewer, S. A.; Willson, T. M.; Stimmel, J. B., Structural basis for antagonist-mediated recruitment of nuclear co-repressors by PPARalpha. *Nature* **2002**, 415, (6873), 813-7.
7. Cronet, P.; Petersen, J. F.; Folmer, R.; Blomberg, N.; Sjoblom, K.; Karlsson, U.; Lindstedt, E. L.; Bamberg, K., Structure of the PPARalpha and -gamma ligand binding domain in complex with AZ 242; ligand selectivity and agonist activation in the PPAR family. *Structure* **2001**, 9, (8), 699-706.

8. Fyffe, S. A.; Alphey, M. S.; Buetow, L.; Smith, T. K.; Ferguson, M. A.; Sorensen, M. D.; Bjorkling, F.; Hunter, W. N., Recombinant human PPAR-beta/delta ligand-binding domain is locked in an activated conformation by endogenous fatty acids. *J Mol Biol* **2006**, 356, (4), 1005-13.
9. Gampe, R. T., Jr.; Montana, V. G.; Lambert, M. H.; Miller, A. B.; Bledsoe, R. K.; Milburn, M. V.; Kliewer, S. A.; Willson, T. M.; Xu, H. E., Asymmetry in the PPARgamma/RXRalpha crystal structure reveals the molecular basis of heterodimerization among nuclear receptors. *Mol Cell* **2000**, 5, (3), 545-55.
10. Kallen, J. A.; Schlaeppi, J. M.; Bitsch, F.; Geisse, S.; Geiser, M.; Delhon, I.; Fournier, B., X-ray structure of the hRORalpha LBD at 1.63 A: structural and functional data that cholesterol or a cholesterol derivative is the natural ligand of RORalpha. *Structure* **2002**, 10, (12), 1697-707.
11. Stehlin, C.; Wurtz, J. M.; Steinmetz, A.; Greiner, E.; Schule, R.; Moras, D.; Renaud, J. P., X-ray structure of the orphan nuclear receptor RORbeta ligand-binding domain in the active conformation. *Embo J* **2001**, 20, (21), 5822-31.
12. Stehlin-Gaon, C.; Willmann, D.; Zeyer, D.; Sanglier, S.; Van Dorsselaer, A.; Renaud, J. P.; Moras, D.; Schule, R., All-trans retinoic acid is a ligand for the orphan nuclear receptor ROR beta. *Nat Struct Biol* **2003**, 10, (10), 820-5.
13. Billas, I. M.; Iwema, T.; Garnier, J. M.; Mitschler, A.; Rochel, N.; Moras, D., Structural adaptability in the ligand-binding pocket of the ecdysone hormone receptor. *Nature* **2003**, 426, (6962), 91-6.

14. Carmichael, J. A.; Lawrence, M. C.; Graham, L. D.; Pilling, P. A.; Epa, V. C.; Noyce, L.; Lovrecz, G.; Winkler, D. A.; Pawlak-Skrzecz, A.; Eaton, R. E.; Hannan, G. N.; Hill, R. J., The X-ray structure of a hemipteran ecdysone receptor ligand-binding domain: comparison with a lepidopteran ecdysone receptor ligand-binding domain and implications for insecticide design. *J Biol Chem* **2005**, 280, (23), 22258-69.
15. Devarakonda, S.; Harp, J. M.; Kim, Y.; Ozyhar, A.; Rastinejad, F., Structure of the heterodimeric ecdysone receptor DNA-binding complex. *Embo J* **2003**, 22, (21), 5827-40.
16. Iwema, T.; Billas, I. M.; Beck, Y.; Bonneton, F.; Nierengarten, H.; Chaumot, A.; Richards, G.; Laudet, V.; Moras, D., Structural and functional characterization of a novel type of ligand-independent RXR-USP receptor. *Embo J* **2007**, 26, (16), 3770-82.
17. Svensson, S.; Ostberg, T.; Jacobsson, M.; Norstrom, C.; Stefansson, K.; Hallen, D.; Johansson, I. C.; Zachrisson, K.; Ogg, D.; Jendeberg, L., Crystal structure of the heterodimeric complex of LXRA $\alpha$  and RXR $\beta$  ligand-binding domains in a fully agonistic conformation. *Embo J* **2003**, 22, (18), 4625-33.
18. Williams, S.; Bledsoe, R. K.; Collins, J. L.; Boggs, S.; Lambert, M. H.; Miller, A. B.; Moore, J.; McKee, D. D.; Moore, L.; Nichols, J.; Parks, D.; Watson, M.; Wisely, B.; Willson, T. M., X-ray crystal structure of the liver X receptor beta ligand binding domain: regulation by a histidine-tryptophan switch. *J Biol Chem* **2003**, 278, (29), 27138-43.

19. Farnegardh, M.; Bonn, T.; Sun, S.; Ljunggren, J.; Ahola, H.; Wilhelmsson, A.; Gustafsson, J. A.; Carlquist, M., The three-dimensional structure of the liver X receptor beta reveals a flexible ligand-binding pocket that can accommodate fundamentally different ligands. *J Biol Chem* **2003**, *278*, (40), 38821-8.
20. Hoerer, S.; Schmid, A.; Heckel, A.; Budzinski, R. M.; Nar, H., Crystal structure of the human liver X receptor beta ligand-binding domain in complex with a synthetic agonist. *J Mol Biol* **2003**, *334*, (5), 853-61.
21. Downes, M.; Verdecia, M. A.; Roecker, A. J.; Hughes, R.; Hogenesch, J. B.; Kast-Woelbern, H. R.; Bowman, M. E.; Ferrer, J. L.; Anisfeld, A. M.; Edwards, P. A.; Rosenfeld, J. M.; Alvarez, J. G.; Noel, J. P.; Nicolaou, K. C.; Evans, R. M., A chemical, genetic, and structural analysis of the nuclear bile acid receptor FXR. *Mol Cell* **2003**, *11*, (4), 1079-92.
22. Mi, L. Z.; Devarakonda, S.; Harp, J. M.; Han, Q.; Pellicciari, R.; Willson, T. M.; Khorasanizadeh, S.; Rastinejad, F., Structural basis for bile acid binding and activation of the nuclear receptor FXR. *Mol Cell* **2003**, *11*, (4), 1093-100.
23. Adachi, R.; Shulman, A. I.; Yamamoto, K.; Shimomura, I.; Yamada, S.; Mangelsdorf, D. J.; Makishima, M., Structural determinants for vitamin D receptor response to endocrine and xenobiotic signals. *Mol Endocrinol* **2004**, *18*, (1), 43-52.
24. Rochel, N.; Tocchini-Valentini, G.; Egea, P. F.; Juntunen, K.; Garnier, J. M.; Vihko, P.; Moras, D., Functional and structural characterization of the insertion region in

the ligand binding domain of the vitamin D nuclear receptor. *Eur J Biochem* **2001**, 268, (4), 971-9.

25. Watkins, R. E.; Davis-Searles, P. R.; Lambert, M. H.; Redinbo, M. R., Coactivator binding promotes the specific interaction between ligand and the pregnane X receptor. *J Mol Biol* **2003**, 331, 815-828.

26. Chrencik, J. E.; Orans, J.; Moore, L. B.; Xue, Y.; Peng, L.; Collins, J. L.; Wisely, G. B.; Lambert, M. H.; Kliewer, S. A.; Redinbo, M. R., Structural disorder in the complex of human pregnane X receptor and the macrolide antibiotic rifampicin. *Mol Endocrinol* **2005**, 19, (5), 1125-34.

27. Xue, Y.; Chao, E.; Zuercher, W. J.; Willson, T. M.; Collins, J. L.; Redinbo, M. R., Crystal structure of the PXR-T1317 complex provides a scaffold to examine the potential for receptor antagonism. *Bioorg Med Chem* **2007**, 15, (5), 2156-66.

28. Xue, Y.; Moore, L. B.; Orans, J.; Peng, L.; Bencharit, S.; Kliewer, S. A.; Redinbo, M. R., Crystal structure of the pregnane X receptor-estradiol complex provides insights into endobiotic recognition. *Mol Endocrinol* **2007**, 21, (5), 1028-38.

29. Suino, K.; Peng, L.; Reynolds, R.; Li, Y.; Cha, J. Y.; Repa, J. J.; Kliewer, S. A.; Xu, H. E., The nuclear xenobiotic receptor CAR: structural determinants of constitutive activation and heterodimerization. *Mol Cell* **2004**, 16, (6), 893-905.

30. Xu, R. X.; Lambert, M. H.; Wisely, B. B.; Warren, E. N.; Weinert, E. E.; Waitt, G. M.; Williams, J. D.; Collins, J. L.; Moore, L. B.; Willson, T. M.; Moore, J. T., A

structural basis for constitutive activity in the human CAR/RXRalpha heterodimer. *Mol Cell* **2004**, 16, (6), 919-28.

31. Dhe-Paganon, S.; Duda, K.; Iwamoto, M.; Chi, Y. I.; Shoelson, S. E., Crystal structure of the HNF4 alpha ligand binding domain in complex with endogenous fatty acid ligand. *J Biol Chem* **2002**, 277, (41), 37973-6.

32. Egea, P. F.; Mitschler, A.; Rochel, N.; Ruff, M.; Chambon, P.; Moras, D., Crystal structure of the human RXRalpha ligand-binding domain bound to its natural ligand: 9-cis retinoic acid. *Embo J* **2000**, 19, (11), 2592-601.

33. Zhao, Q.; Chasse, S. A.; Devarakonda, S.; Sierk, M. L.; Ahvazi, B.; Rastinejad, F., Structural basis of RXR-DNA interactions. *J Mol Biol* **2000**, 296, (2), 509-20.

34. Holmbeck, S. M.; Foster, M. P.; Casimiro, D. R.; Sem, D. S.; Dyson, H. J.; Wright, P. E., High-resolution solution structure of the retinoid X receptor DNA-binding domain. *J Mol Biol* **1998**, 281, (2), 271-84.

35. Renaud, J. P.; Rochel, N.; Ruff, M.; Vivat, V.; Chambon, P.; Gronemeyer, H.; Moras, D., Crystal structure of the RAR-gamma ligand-binding domain bound to all-trans retinoic acid. *Nature* **1995**, 378, (6558), 681-9.

36. Brzozowski, A. M.; Pike, A. C.; Dauter, Z.; Hubbard, R. E.; Bonn, T.; Engstrom, O.; Ohman, L.; Greene, G. L.; Gustafsson, J. A.; Carlquist, M., Molecular basis of agonism and antagonism in the oestrogen receptor. *Nature* **1997**, 389, (6652), 753-8.



37. Vajdos, F. F.; Hoth, L. R.; Geoghegan, K. F.; Simons, S. P.; LeMotte, P. K.; Danley, D. E.; Ammirati, M. J.; Pandit, J., The 2.0 Å crystal structure of the ERalpha ligand-binding domain complexed with lasofoxifene. *Protein Sci* **2007**, 16, (5), 897-905.
38. Schwabe, J. W.; Chapman, L.; Finch, J. T.; Rhodes, D.; Neuhaus, D., DNA recognition by the oestrogen receptor: from solution to the crystal. *Structure* **1993**, 1, (3), 187-204.
39. Warnmark, A.; Wikstrom, A.; Wright, A. P.; Gustafsson, J. A.; Hard, T., The N-terminal regions of estrogen receptor alpha and beta are unstructured in vitro and show different TBP binding properties. *J Biol Chem* **2001**, 276, (49), 45939-44.
40. Pike, A. C.; Brzozowski, A. M.; Hubbard, R. E.; Bonn, T.; Thorsell, A. G.; Engstrom, O.; Ljunggren, J.; Gustafsson, J. A.; Carlquist, M., Structure of the ligand-binding domain of oestrogen receptor beta in the presence of a partial agonist and a full antagonist. *Embo J* **1999**, 18, (17), 4608-18.
41. Shiau, A. K.; Barstad, D.; Radek, J. T.; Meyers, M. J.; Nettles, K. W.; Katzenellenbogen, B. S.; Katzenellenbogen, J. A.; Agard, D. A.; Greene, G. L., Structural characterization of a subtype-selective ligand reveals a novel mode of estrogen receptor antagonism. *Nat Struct Biol* **2002**, 9, (5), 359-64.
42. Kallen, J.; Schlaeppli, J. M.; Bitsch, F.; Filipuzzi, I.; Schilb, A.; Riou, V.; Graham, A.; Strauss, A.; Geiser, M.; Fournier, B., Evidence for ligand-independent transcriptional activation of the human estrogen-related receptor alpha (ERRalpha): crystal structure of

ERRalpha ligand binding domain in complex with peroxisome proliferator-activated receptor coactivator-1alpha. *J Biol Chem* **2004**, 279, (47), 49330-7.

43. Gearhart, M. D.; Holmbeck, S. M.; Evans, R. M.; Dyson, H. J.; Wright, P. E., Monomeric complex of human orphan estrogen related receptor-2 with DNA: a pseudo-dimer interface mediates extended half-site recognition. *J Mol Biol* **2003**, 327, (4), 819-32.

44. Greschik, H.; Flaig, R.; Renaud, J. P.; Moras, D., Structural basis for the deactivation of the estrogen-related receptor gamma by diethylstilbestrol or 4-hydroxytamoxifen and determinants of selectivity. *J Biol Chem* **2004**, 279, (32), 33639-46.

45. Greschik, H.; Wurtz, J. M.; Sanglier, S.; Bourguet, W.; van Dorsselaer, A.; Moras, D.; Renaud, J. P., Structural and functional evidence for ligand-independent transcriptional activation by the estrogen-related receptor 3. *Mol Cell* **2002**, 9, (2), 303-13.

46. Kauppi, B.; Jakob, C.; Farnegardh, M.; Yang, J.; Ahola, H.; Alarcon, M.; Calles, K.; Engstrom, O.; Harlan, J.; Muchmore, S.; Ramqvist, A. K.; Thorell, S.; Ohman, L.; Greer, J.; Gustafsson, J. A.; Carlstedt-Duke, J.; Carlquist, M., The three-dimensional structures of antagonistic and agonistic forms of the glucocorticoid receptor ligand-binding domain: RU-486 induces a transconformation that leads to active antagonism. *J Biol Chem* **2003**, 278, (25), 22748-54.

47. Bledsoe, R. K.; Montana, V. G.; Stanley, T. B.; Delves, C. J.; Apolito, C. J.; McKee, D. D.; Consler, T. G.; Parks, D. J.; Stewart, E. L.; Willson, T. M.; Lambert, M. H.; Moore, J. T.; Pearce, K. H.; Xu, H. E., Crystal structure of the glucocorticoid receptor ligand binding domain reveals a novel mode of receptor dimerization and coactivator recognition. *Cell* **2002**, 110, 93-105.
48. Dahlman-Wright, K.; Baumann, H.; McEwan, I. J.; Almlöf, T.; Wright, A. P.; Gustafsson, J. A.; Hard, T., Structural characterization of a minimal functional transactivation domain from the human glucocorticoid receptor. *Proc Natl Acad Sci U S A* **1995**, 92, (5), 1699-703.
49. Bledsoe, R. K.; Madauss, K. P.; Holt, J. A.; Apolito, C. J.; Lambert, M. H.; Pearce, K. H.; Stanley, T. B.; Stewart, E. L.; Trump, R. P.; Willson, T. M.; Williams, S. P., A ligand-mediated hydrogen bond network required for the activation of the mineralocorticoid receptor. *J Biol Chem* **2005**, 280, (35), 31283-93.
50. Roemer, S. C.; Donham, D. C.; Sherman, L.; Pon, V. H.; Edwards, D. P.; Churchill, M. E., Structure of the progesterone receptor-deoxyribonucleic acid complex: novel interactions required for binding to half-site response elements. *Mol Endocrinol* **2006**, 20, (12), 3042-52.
51. Madauss, K. P.; Deng, S. J.; Austin, R. J.; Lambert, M. H.; McLay, I.; Pritchard, J.; Short, S. A.; Stewart, E. L.; Uings, I. J.; Williams, S. P., Progesterone receptor ligand binding pocket flexibility: crystal structures of the norethindrone and mometasone furoate complexes. *J Med Chem* **2004**, 47, (13), 3381-7.

52. Bain, D. L.; Franden, M. A.; McManaman, J. L.; Takimoto, G. S.; Horwitz, K. B., The N-terminal region of the human progesterone A-receptor. Structural analysis and the influence of the DNA binding domain. *J Biol Chem* **2000**, 275, (10), 7313-20.
53. Pereira de Jesus-Tran, K.; Cote, P. L.; Cantin, L.; Blanchet, J.; Labrie, F.; Breton, R., Comparison of crystal structures of human androgen receptor ligand-binding domain complexed with various agonists reveals molecular determinants responsible for binding affinity. *Protein Sci* **2006**, 15, (5), 987-99.
54. Sack, J. S.; Kish, K. F.; Wang, C.; Attar, R. M.; Kiefer, S. E.; An, Y.; Wu, G. Y.; Scheffler, J. E.; Salvati, M. E.; Krystek, S. R., Jr.; Weinmann, R.; Einspahr, H. M., Crystallographic structures of the ligand-binding domains of the androgen receptor and its T877A mutant complexed with the natural agonist dihydrotestosterone. *Proc Natl Acad Sci U S A* **2001**, 98, (9), 4904-9.
55. Shaffer, P. L.; Jivan, A.; Dollins, D. E.; Claessens, F.; Gewirth, D. T., Structural basis of androgen receptor binding to selective androgen response elements. *Proc Natl Acad Sci U S A* **2004**, 101, (14), 4758-63.
56. Lavery, D. N.; McEwan, I. J., The human androgen receptor AF1 transactivation domain: interactions with transcription factor IIF and molten-globule-like structural characteristics. *Biochem Soc Trans* **2006**, 34, (Pt 6), 1054-7.
57. Lavery, D. N.; McEwan, I. J., Structural Characterization of the Native NH<sub>2</sub>-Terminal Transactivation Domain of the Human Androgen Receptor: A Collapsed

Disordered Conformation Underlies Structural Plasticity and Protein-Induced Folding.  
*Biochemistry* **2008**, 47, (11), 3360-9.

58. Flaig, R.; Greschik, H.; Peluso-Iltis, C.; Moras, D., Structural basis for the cell-specific activities of the NGFI-B and the Nurr1 ligand-binding domain. *J Biol Chem* **2005**, 280, (19), 19250-8.

59. Wang, Z.; Benoit, G.; Liu, J.; Prasad, S.; Aarnisalo, P.; Liu, X.; Xu, H.; Walker, N. P.; Perlmann, T., Structure and function of Nurr1 identifies a class of ligand-independent nuclear receptors. *Nature* **2003**, 423, (6939), 555-60.

60. Li, Y.; Choi, M.; Cavey, G.; Daugherty, J.; Suino, K.; Kovach, A.; Bingham, N. C.; Kliewer, S. A.; Xu, H. E., Crystallographic identification and functional characterization of phospholipids as ligands for the orphan nuclear receptor steroidogenic factor-1. *Mol Cell* **2005**, 17, (4), 491-502.

61. Krylova, I. N.; Sablin, E. P.; Moore, J.; Xu, R. X.; Waitt, G. M.; MacKay, J. A.; Juzumiene, D.; Bynum, J. M.; Madauss, K.; Montana, V.; Lebedeva, L.; Suzawa, M.; Williams, J. D.; Williams, S. P.; Guy, R. K.; Thornton, J. W.; Fletterick, R. J.; Willson, T. M.; Ingraham, H. A., Structural analyses reveal phosphatidyl inositols as ligands for the NR5 orphan receptors SF-1 and LRH-1. *Cell* **2005**, 120, (3), 343-55.

62. Wang, W.; Zhang, C.; Marimuthu, A.; Krupka, H. I.; Tabrizizad, M.; Shelloe, R.; Mehra, U.; Eng, K.; Nguyen, H.; Settachatgul, C.; Powell, B.; Milburn, M. V.; West, B. L., The crystal structures of human steroidogenic factor-1 and liver receptor homologue-1. *Proc Natl Acad Sci U S A* **2005**, 102, (21), 7505-10.

63. Sablin, E. P.; Krylova, I. N.; Fletterick, R. J.; Ingraham, H. A., Structural basis for ligand-independent activation of the orphan nuclear receptor LRH-1. *Mol Cell* **2003**, 11, (6), 1575-85.
64. Solomon, I. H.; Hager, J. M.; Safi, R.; McDonnell, D. P.; Redinbo, M. R.; Ortlund, E. A., Crystal structure of the human LRH-1 DBD-DNA complex reveals Ftz-F1 domain positioning is required for receptor activity. *J Mol Biol* **2005**, 354, (5), 1091-102.
65. Ortlund, E. A.; Lee, Y.; Solomon, I. H.; Hager, J. M.; Safi, R.; Choi, Y.; Guan, Z.; Tripathy, A.; Raetz, C. R.; McDonnell, D. P.; Moore, D. D.; Redinbo, M. R., Modulation of human nuclear receptor LRH-1 activity by phospholipids and SHP. *Nat Struct Mol Biol* **2005**, 12, (4), 357-63.
